# Supplementary material
Source: Copernicus journal article supplement (doi:10.5194/tc-20-3415-2026)
Supplement: Supplementary file 1 [file tc-20-3415-2026-supplement.pdf]

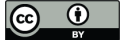

*Supplement of*

## **Thinning-induced glacier deceleration in the Zaskar Himalayas**

**Tirthankar Ghosh et al.**

*Correspondence to:* Tirthankar Ghosh ([tirthankar.ghosh@monash.edu](mailto:tirthankar.ghosh@monash.edu)) and RAAJ Ramsankaran ([ramsankaran@civil.iitb.ac.in](mailto:ramsankaran@civil.iitb.ac.in))

The copyright of individual parts of the supplement might differ from the article licence.

## S1. Data Information

Supplement Table S1. Details of Satellite images and DEM used for annual velocity estimation and analysis, with sensor name and spatial resolution. All the data extracted is from Path: 148, and Row: 37

| Scene ID                                    | Satellite           | Date       | Spatial Resolution |
|---------------------------------------------|---------------------|------------|--------------------|
| LT05 L1TP 148037 19921024 20200914 02 T1 B2 | Landsat 5           | 24-10-1992 | 30m                |
| LT05 L1TP 148037 19930824 20200913 02 T1 B2 | Landsat 5           | 24-08-1993 | 30m                |
| LT05 L1TP 148037 19940726 20200913 02 T1 B2 | Landsat 5           | 26-07-1994 | 30m                |
| LT05 L1TP 148037 19960901 20200911 02 T1 B2 | Landsat 5           | 01-09-1996 | 30m                |
| LT05 L1TP 148037 19970920 20200909 02 T1 B2 | Landsat 5           | 20-09-1997 | 30m                |
| LT05 L1TP 148037 19981009 20200908 02 T1 B2 | Landsat 5           | 09-10-1998 | 30m                |
| LE07 L1TP 148037 19990817 20200918 02 T1 B8 | Landsat 7           | 17-08-1999 | 15m                |
| LE07 L1TP 148037 20000904 20200917 02 T1 B8 | Landsat 7           | 04-09-2000 | 15m                |
| LE07 L1TP 148037 20021028 20200916 02 T1 B8 | Landsat 7           | 28-10-2002 | 15m                |
| LT05 L1TP 148037 20081004 20200828 02 T1 B2 | Landsat 5           | 04-10-2008 | 30m                |
| LT05 L1TP 148037 20091007 20200825 02 T1 B2 | Landsat 5           | 07-10-2009 | 30m                |
| LT05 L1TP 148037 20101010 20200823 02 T1 B2 | Landsat 5           | 10-10-2010 | 30m                |
| LT05 L1TP 148037 20110927 20200820 02 T1 B2 | Landsat 5           | 27-09-2011 | 30m                |
| LC08 L1TP 148037 20130714 20200912 02 T1 B8 | Landsat 8           | 14-07-2013 | 15m                |
| LC08 L1TP 148037 20141005 20200910 02 T1 B8 | Landsat 8           | 05-10-2014 | 15m                |
| LC08 L1TP 148037 20151008 20200908 02 T1 B8 | Landsat 8           | 08-10-2015 | 15m                |
| LC08 L1TP 148037 20160908 20200906 02 T1 B8 | Landsat 8           | 08-09-2016 | 15m                |
| LC08 L1TP 148037 20171029 20200902 02 T1 B8 | Landsat 8           | 29-10-2017 | 15m                |
| LC08 L1TP 148037 20180829 20200831 02 T1 B8 | Landsat 8           | 29-08-2018 | 15m                |
| LC08 L1TP 148037 20190629 20200829 02 T1 B8 | Landsat 8           | 29-09-2019 | 15m                |
| LC08 L1TP 148037 20200919 20201006 02 T1 B8 | Landsat 8           | 19-09-2020 | 15m                |
| LC08 L1TP 148037 20210906 20210915 02 T1 B8 | Landsat 8           | 06-09-2021 | 15m                |
| LC09 L1TP 148037 20220901 20230331 02 T1 B8 | Landsat 8           | 01-09-2022 | 15m                |
| LC09 L1TP 148037 20230904 20230904 02 T1 B8 | Landsat 8           | 04-09-2023 | 15m                |
| <b>DEM</b>                                  | <b>Data Version</b> |            |                    |
| ASTGTMV003_N33E076_dem_32643                | ASTER<br>GDEM V003  | -          | 30m                |

**Supplement Table S2. Details for satellite image pairs used for glacier surface velocity, with the estimated uncertainty**

| <b>Inter-Annual Velocity</b> |                                                    |
|------------------------------|----------------------------------------------------|
| <b>Velocity Image Pair</b>   | <b>Estimated Uncertainty (m year<sup>-1</sup>)</b> |
| 24-10-1992 - 24-08-1993      | 4.57                                               |
| 24-08-1993 - 26-07-1994      | 4.33                                               |
| 26-07-1994 - 01-09-1996      | 4.63                                               |
| 01-09-1996 - 20-09-1997      | 4.92                                               |
| 20-09-1997 - 09-10-1998      | 3.71                                               |
| 17-08-1999 - 04-09-2000      | 5.58                                               |
| 04-09-2000 - 28-10-2002      | 5.09                                               |
| 04-10-2008 - 07-10-2009      | 4.38                                               |
| 07-10-2009 - 10-10-2010      | 5.49                                               |
| 10-10-2010 - 27-09-2011      | 4.73                                               |
| 14-07-2013 - 05-10-2014      | 3.44                                               |
| 05-10-2014 - 08-10-2015      | 1.32                                               |
| 08-10-2015 - 08-09-2016      | 1.36                                               |
| 08-09-2016 - 29-10-2017      | 0.85                                               |
| 29-10-2017 - 29-08-2018      | 2.09                                               |
| 29-08-2018 - 29-09-2019      | 2.26                                               |
| 29-09-2019 - 19-09-2020      | 1.08                                               |
| 19-09-2020 - 06-09-2021      | 1.81                                               |
| 06-09-2021 - 01-09-2022      | 1.62                                               |
| 01-09-2022 - 04-09-2023      | 1.00                                               |

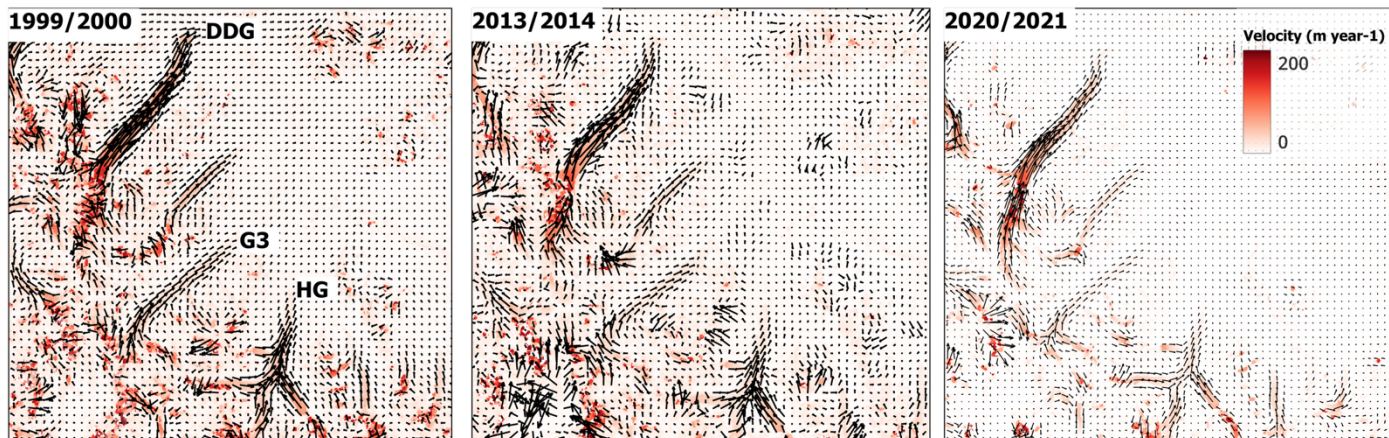

**Supplement Figure S1: Velocity maps from different time periods (1999/2000, 2013/2014, and 2020/2021) overlaid with velocity vectors over some of the glaciers analysed in this study.**

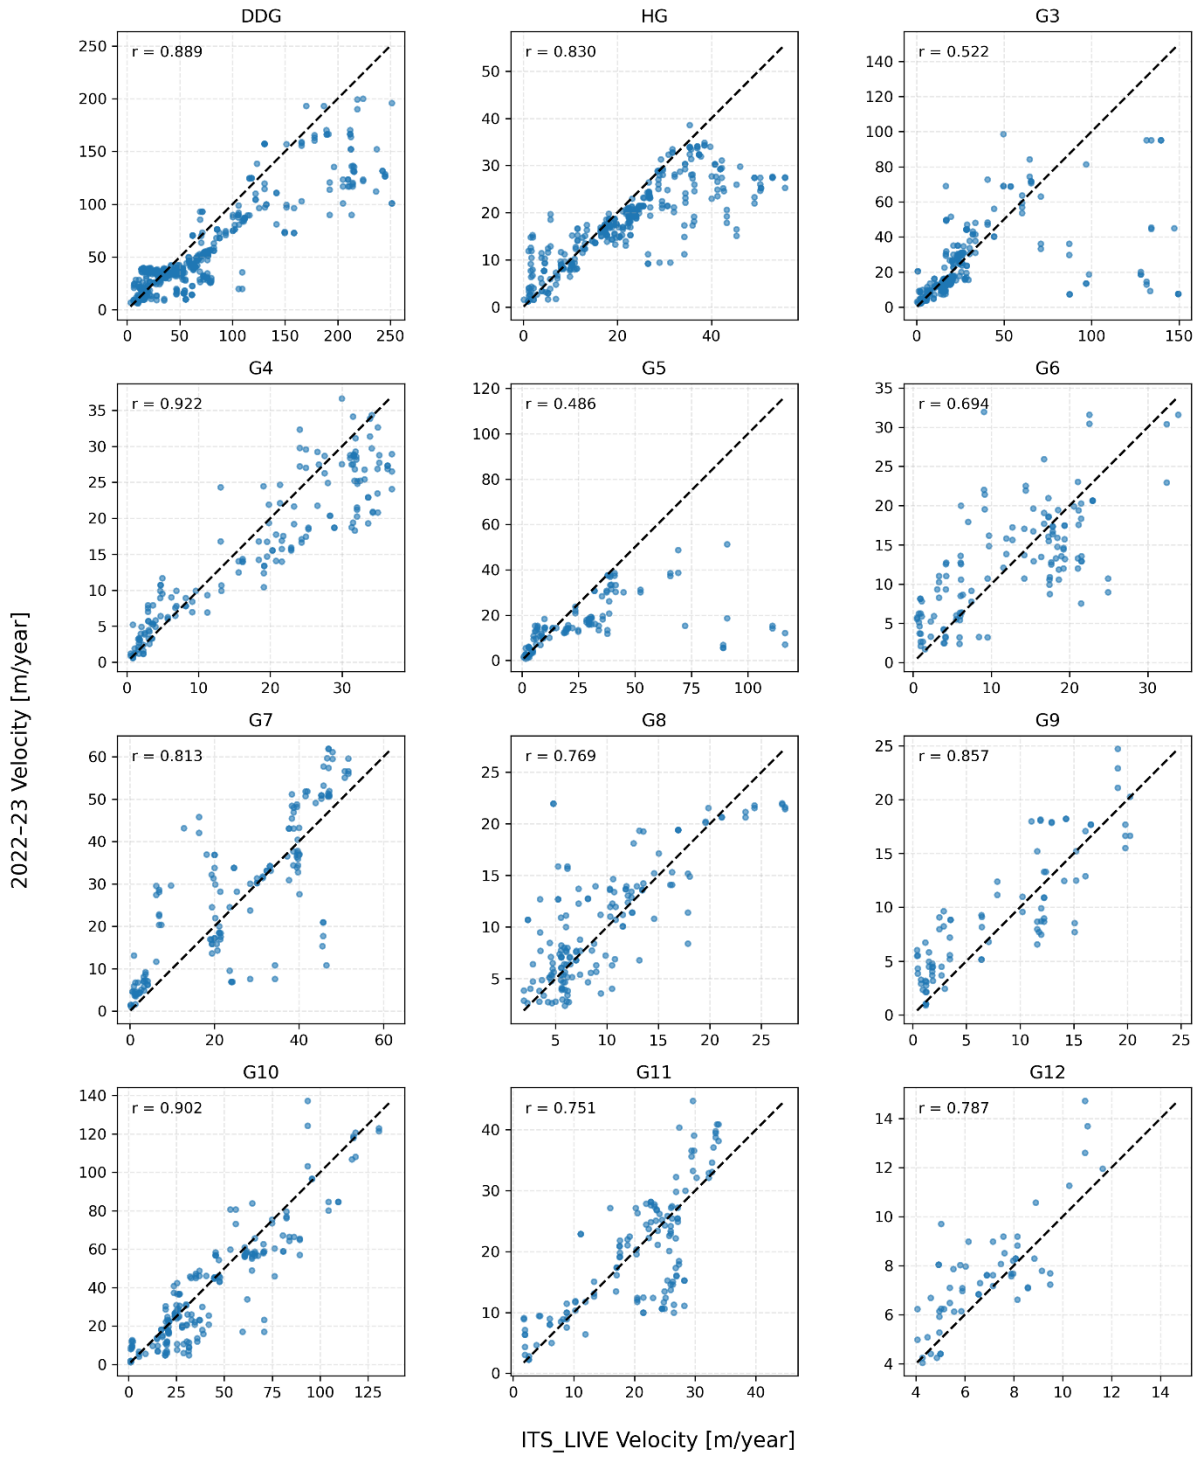

**Supplement Figure S2: Comparison of ITS\_LIVE velocity data (x-axis) (Gardner et al., 2025) with the data generated in this study (y-axis) for the year 2022-2023 for all the glaciers and the reported correlation coefficient  $r$ . The black dotted line represents the 1:1 correlation line.**

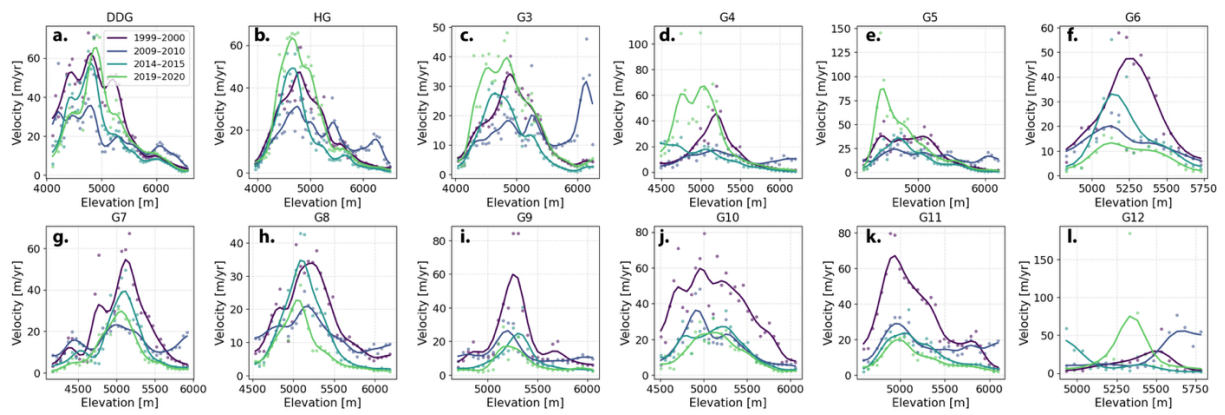

**Supplement Figure S3: (a-l) Velocity distribution of different glaciers in different elevation zones (bin size=50m) for different velocity time periods. Circles represent median values from each elevation bin, and the Gaussian-smoothed (sigma=1.5) lines show the trend. Each time period (1999-2000, 2009-2010, 2014-2015 and 2019-2020) is represented.**

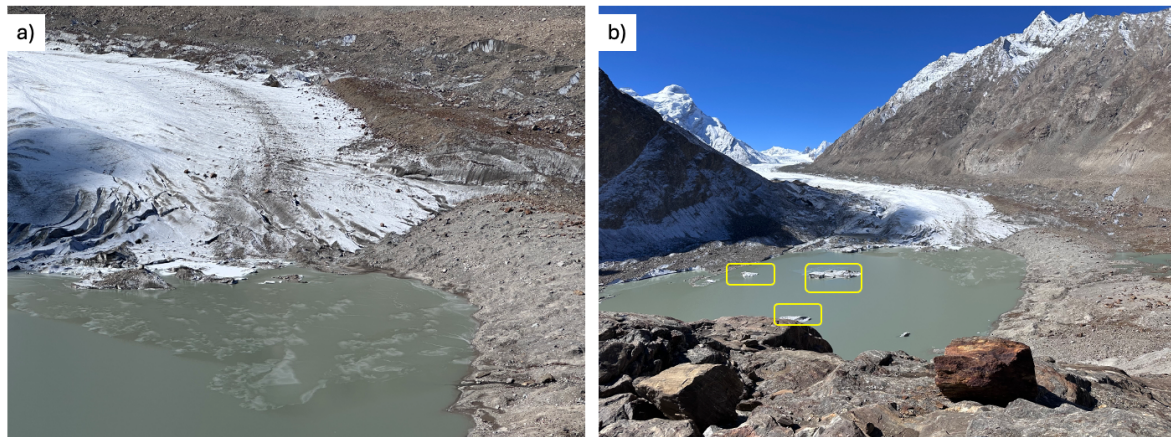

**Supplement Figure S4: field photographs show a) the terminus of DDG in contact with the glacial lake; b) the presence of icebergs (marked in yellow box) floating in the glacial lake, indicating that DDG undergoes mechanical calving events. Photographs are from October 2023. (Photos taken by Andrew Mackintosh)**

#### References:

Gardner, A. S., Greene, C. A., Kennedy, J. H., Fahnestock, M. A., Liukis, M., López, L. A., Lei, Y., Scambos, T. A., and Dehecq, A.: ITS\_LIVE global glacier velocity data in near-real time, *The Cryosphere*, 19, 3517–3533, <https://doi.org/10.5194/tc-19-3517-2025>, 2025.
